# Supplementary material for: TiO2 nanoparticles generate superoxide and alter gene expression in human lung cells
Source: PubMed Central journal article supplement — RSC Adv. 2019 Aug 12;9(43):25039–47. doi: 10.1039/c9ra04037d (PMC8939877; doi:10.1039/c9ra04037d), 2019-08-12
Supplement: NIHMS1065870-supplement-SI.pdf [file NIHMS1065870-supplement-SI.pdf]

# SUPPORTING INFORMATION

## Sub-cytotoxic concentrations of TiO<sub>2</sub> nanoparticles generate superoxide and alter gene expression in human lung cells

Dhanya T. Jayaram,<sup>†</sup> Ashwath Kumar,<sup>¶</sup> Linda E. Kippner,<sup>‡, #</sup> Po-Yi Ho,<sup>¶, #</sup> Melissa L. Kemp,<sup>‡, §, \*</sup>  
Yuhong Fan,<sup>¶, §, \*</sup> Christine K. Payne<sup>†, \*</sup>

<sup>†</sup>Department of Mechanical Engineering and Materials Science, Duke University, Durham, NC 27708, USA. <sup>¶</sup>School of Biological Sciences, Georgia Institute of Technology, Atlanta, GA 30332, USA. <sup>‡</sup>The Wallace H. Coulter Department of Biomedical Engineering, Georgia Institute of Technology and Emory University, Atlanta, GA 30332, USA. <sup>§</sup>Parker H. Petit Institute for Bioengineering and Biosciences, Georgia Institute of Technology, Atlanta, GA 30332, USA.

\*e-mail: yuhong.fan@biology.gatech.edu, melissa.kemp@bme.gatech.edu,  
christine.payne@duke.edu

#Present Addresses: Linda E. Kippner: Marcus Center for Therapeutic Cell Characterization and Manufacturing, Georgia Institute of Technology, Atlanta, GA 30318; Po-Yi Ho: Molecular Epidemiology & Bioinformatics Team, Division of Viral Hepatitis, Centers for Disease Control and Prevention (CDC), Atlanta, GA 30329

**Table S1. Sequencing reads summary of RNA-Seq libraries.**

| Sample               | Total sequencing reads | Uniquely mapped reads | Uniquely mapped reads (% of total reads) | Unmapped reads | Unmapped reads (% of total reads) | Total mapped reads | Total mapped reads (% of total reads) |
|----------------------|------------------------|-----------------------|------------------------------------------|----------------|-----------------------------------|--------------------|---------------------------------------|
| <b>Generation 1</b>  |                        |                       |                                          |                |                                   |                    |                                       |
| Ctrl(G1)_1           | 59,751,708             | 48,181,700            | 80.64                                    | 386,879        | 0.65                              | 59,364,829         | 99.35                                 |
| Ctrl(G1)_2           | 64,587,351             | 54,215,971            | 83.94                                    | 422,184        | 0.65                              | 64,165,167         | 99.35                                 |
| Ctrl(G1)_3           | 49,945,215             | 41,444,145            | 82.98                                    | 304,587        | 0.61                              | 49,640,628         | 99.39                                 |
| G1_1                 | 50,098,890             | 42,289,847            | 84.41                                    | 385,139        | 0.77                              | 49,713,751         | 99.23                                 |
| G1_2                 | 49,555,439             | 41,726,349            | 84.20                                    | 394,522        | 0.80                              | 49,160,917         | 99.20                                 |
| G1_3                 | 48,412,083             | 39,612,225            | 81.82                                    | 395,774        | 0.82                              | 48,016,309         | 99.18                                 |
| <b>Generation 10</b> |                        |                       |                                          |                |                                   |                    |                                       |
| Ctrl(G10)_1          | 41,819,285             | 33,728,982            | 80.65                                    | 805,253        | 1.93                              | 41,014,032         | 98.07                                 |
| Ctrl(G10)_2          | 46,062,713             | 37,682,665            | 81.81                                    | 633,069        | 1.37                              | 45,429,644         | 98.63                                 |
| Ctrl(G10)_3          | 46,412,991             | 37,832,576            | 81.51                                    | 637,844        | 1.37                              | 45,775,147         | 98.63                                 |
| G10_1                | 40,197,773             | 32,578,151            | 81.04                                    | 618,449        | 1.54                              | 39,579,324         | 98.46                                 |
| G10_2                | 41,105,591             | 33,348,713            | 81.13                                    | 633,362        | 1.54                              | 40,472,229         | 98.46                                 |
| G10_3                | 40,947,519             | 33,971,224            | 82.96                                    | 589,528        | 1.44                              | 40,357,991         | 98.56                                 |
| <b>Re-challenge</b>  |                        |                       |                                          |                |                                   |                    |                                       |
| Ctrl (ReC)_1         | 46,380,195             | 36,327,224            | 78.32                                    | 715,819        | 1.54                              | 45,664,376         | 98.46                                 |
| Ctrl (ReC)_2         | 58,541,006             | 47,129,751            | 80.51                                    | 818,210        | 1.40                              | 57,722,796         | 98.60                                 |
| Ctrl (ReC)_3         | 48,280,217             | 36,644,376            | 75.90                                    | 647,652        | 1.34                              | 47,632,565         | 98.66                                 |
| ReC_1                | 55,447,838             | 39,019,388            | 70.37                                    | 608,370        | 1.10                              | 54,839,468         | 98.90                                 |
| ReC_2                | 45,279,571             | 32,152,960            | 71.01                                    | 617,851        | 1.36                              | 44,661,720         | 98.64                                 |
| ReC_3                | 43,690,593             | 30,451,739            | 69.70                                    | 717,512        | 1.64                              | 42,973,081         | 98.36                                 |

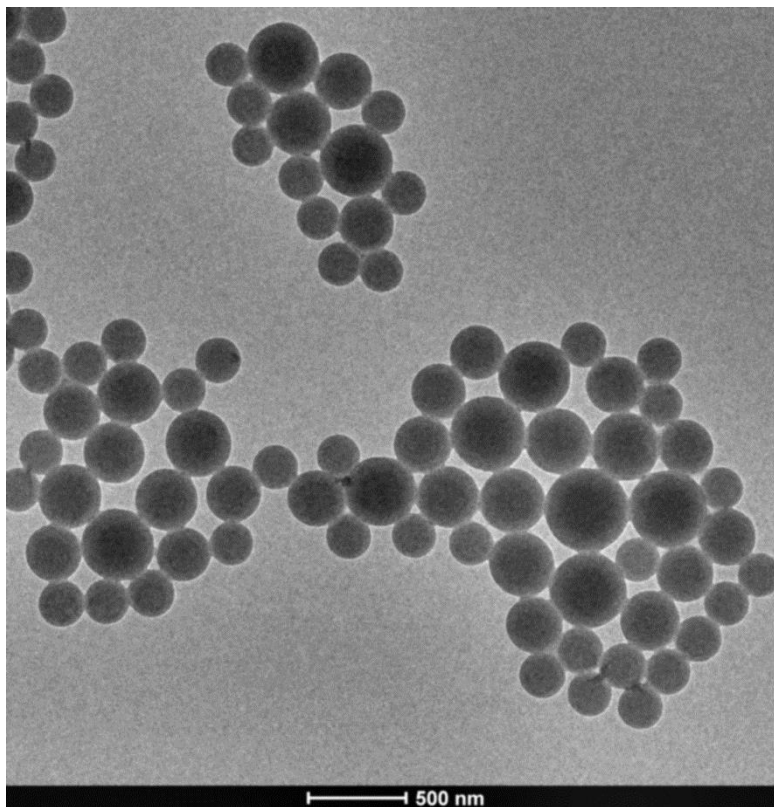

**Figure S1.** Representative TEM image of the polystyrene NPs (#F8806, Life Technologies, Carlsbad, CA) used in experiments.

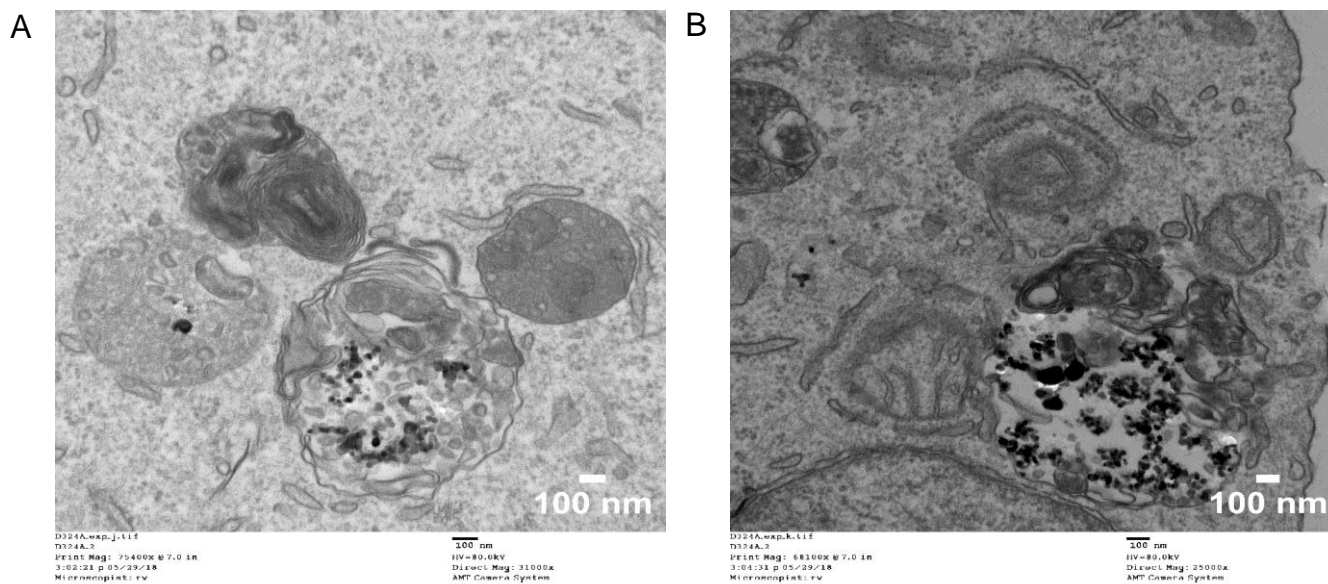

**Figure S2.** TEM images of A549 cells incubated with TiO<sub>2</sub> NPs (800 µg/mL, 24 hr, 37°C) shows association with myelin-like figures. A and B are representative images.

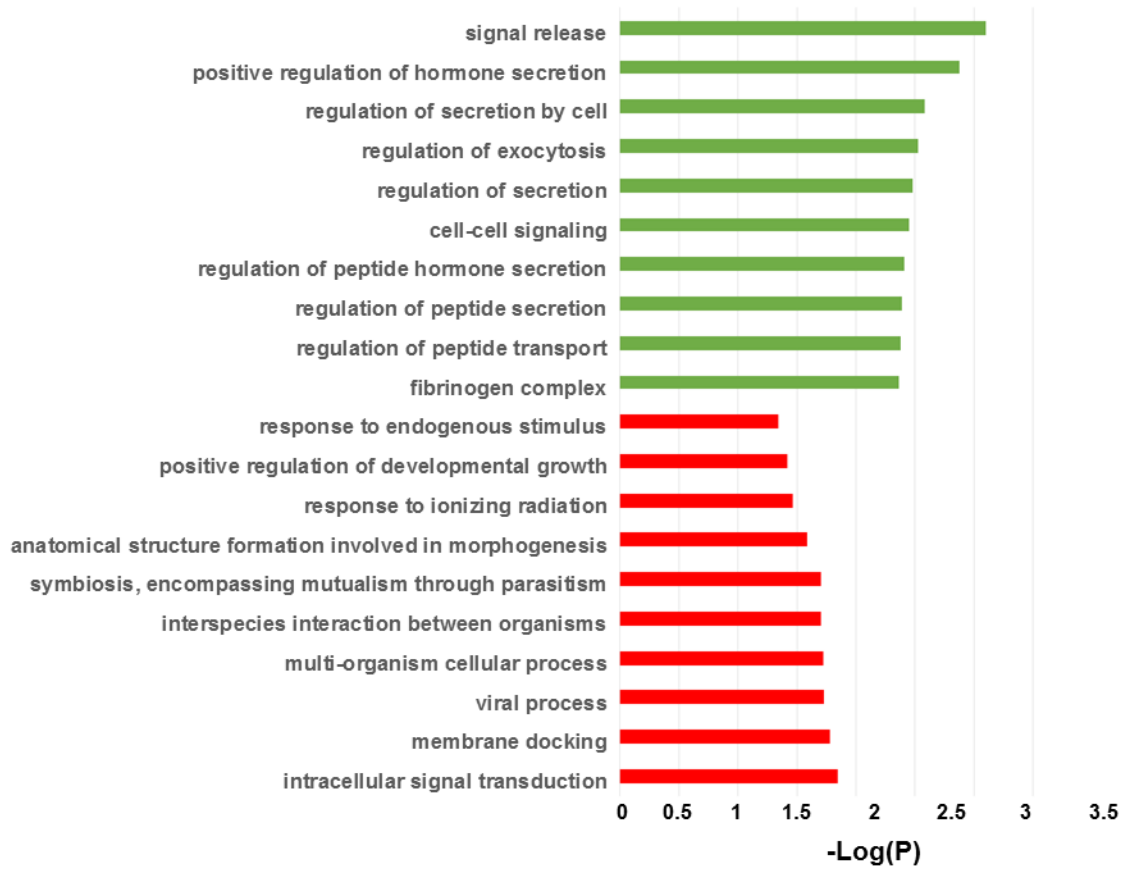

**Figure S3.** Gene ontology analysis of differentially expressed genes common to Generation 10 (G10) and re-challenged (ReC) cells. Top enriched GO terms of UpUp genes (red) and DownDown genes (green) are shown.

**Table S2.** Differentially expressed genes (DEGs) and corresponding fold change (FC) related to oxidative stress at Generation 1 (G1), Generation 10 (G10), and following a re-challenge (ReC). These genes had FC<2, the cutoff used for results presented in the main text, but were of particular interest based on previous results. DEGs with p<0.01 are shaded.

| <b>Oxidative stress-related DEG</b> | <b>G1 FC</b> | <b>G10 FC</b> | <b>ReC FC</b> |
|-------------------------------------|--------------|---------------|---------------|
| PRDX1                               | -1.65        | -1.11         | -1.17         |
| PRDX2                               | -1.55        | 1.04          | -1.17         |
| PRDX3                               | -2.05        | -1            | -1.07         |
| PRDX4                               | -1.04        | 1.05          | -1.14         |
| PRDX5                               | -1.13        | 1.03          | 1             |
| PRDX6                               | -1.37        | -1.04         | -1.08         |
| SOD1                                | -1.82        | -1.01         | -1.31         |
| SOD2                                | -1.01        | 1.01          | 1.25          |
| SOD3                                | NA           | NA            | 1.01          |

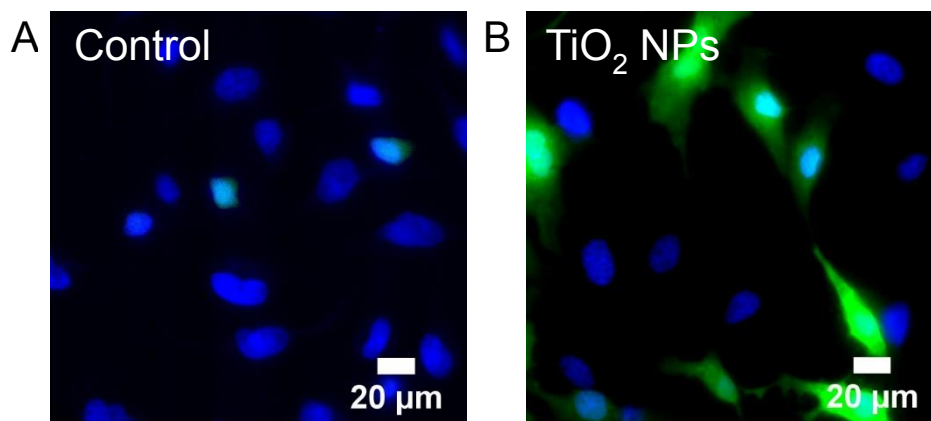

**Figure S4.** H<sub>2</sub>DCF, a non-specific probe of intracellular ROS, was used to image ROS in Generation 1 HeLa cells. H<sub>2</sub>DCFDA (5 μM) was incubated with cells for 30 min prior to imaging and then rinsed with PBS. A. Untreated control cells. B. TiO<sub>2</sub> NP-treated cells (773 μg/mL, 24 hr, 37°C). This concentration of TiO<sub>2</sub> NPs was shown previously to be non-cytotoxic with HeLa cells.<sup>[1]</sup> DAPI (blue) was used to label nuclei (50 μM, 30 min).

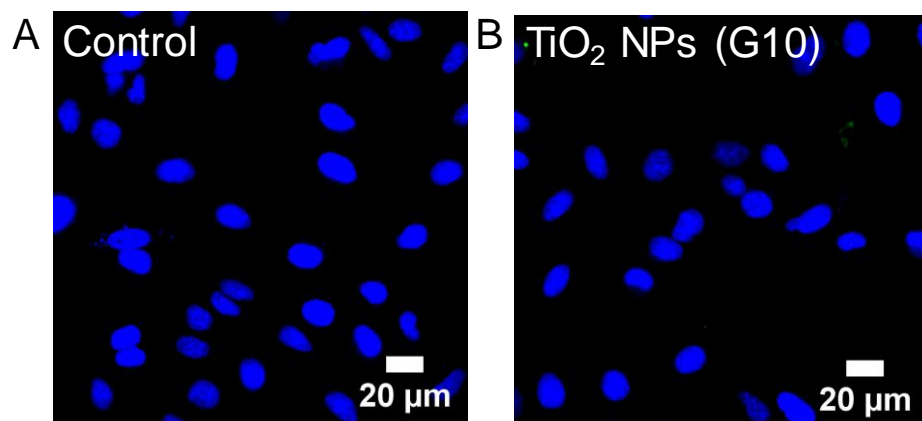

**Figure S5.** H<sub>2</sub>DCF was used to image ROS in Generation 10 A549 cells. H<sub>2</sub>DCFDA (5 μM) was incubated with cells for 30 min prior to imaging and then rinsed with PBS. A. Untreated control cells at Generation 10. B. TiO<sub>2</sub> NP-treated (994 μg/mL, 24 hr, 37°C) cells at Generation 10. DAPI (blue) was used to label nuclei (50 μM, 30 min).



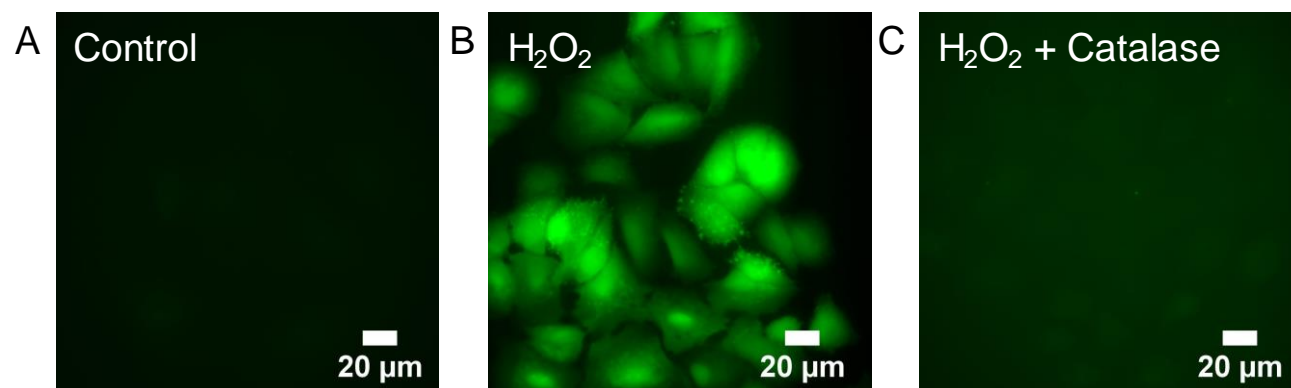

**Figure S6.** H<sub>2</sub>DCFDA assay to confirm catalase activity. H<sub>2</sub>DCFDA (5 μM) was incubated with cells for 30 min prior to imaging and then rinsed with PBS. A. Untreated control cells. B. H<sub>2</sub>O<sub>2</sub> treated cells (50 μM, 30 min, 37°C). C. Co-incubation of H<sub>2</sub>O<sub>2</sub> (50 μM, 30 min, 37°C) with catalase (50 U/mL).

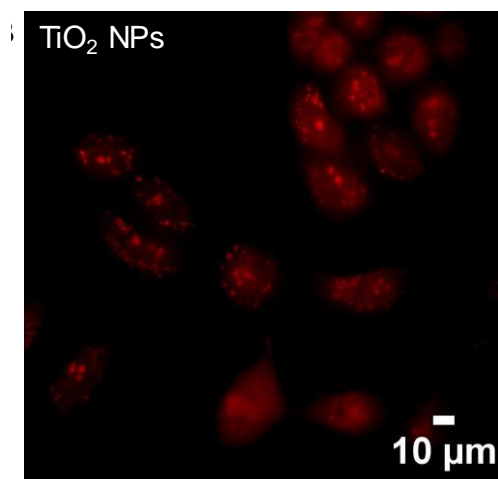

**Figure S7.** DHE assay with cold-bound TiO<sub>2</sub> NPs (994 μg/mL, 10 min, 4°C), which allows binding, but not internalization of NPs. DHE (10 μM) was incubated with cells for 30 min prior to imaging and then rinsed with clear MEM. Figure 9A shows a DHE assay for an untreated control and Figure 9B shows a 24 hr, 37°C TiO<sub>2</sub> NP incubation.

## References

- [1] S. Runa, D. Khanal, M. L. Kemp, C. K. Payne, *J. Phys. Chem. C* **2016**, *120*, 20736.
